# Supplementary material for: Targeting MUC1-C Suppresses Chronic Activation of Cytosolic Nucleotide Receptors and STING in Triple-Negative Breast Cancer
Source: MDPI journal article supplement (doi:10.3390/cancers14112580), 2022-05-24

Figure 2F

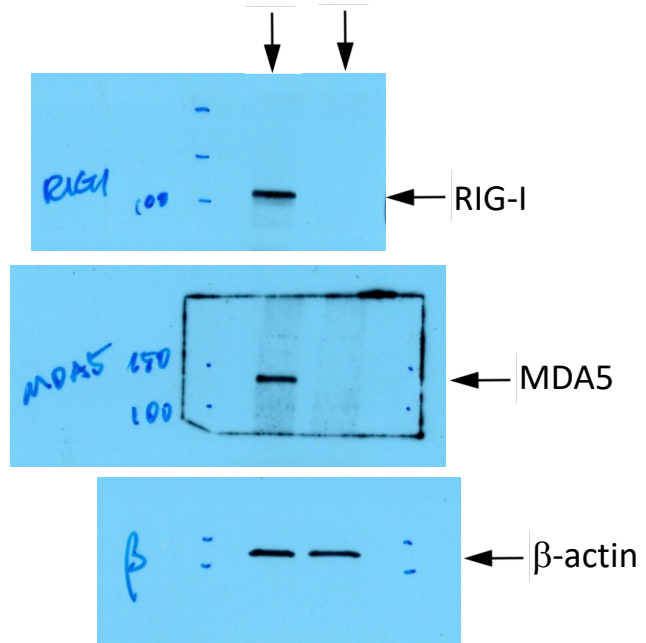

Figure 3B

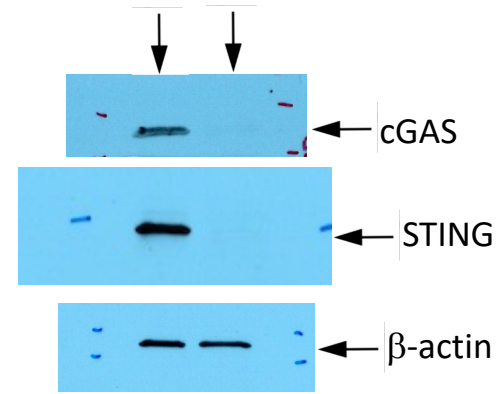

Figure 3C

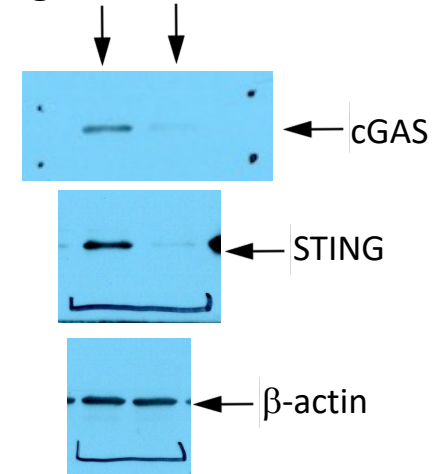

Figure 3D

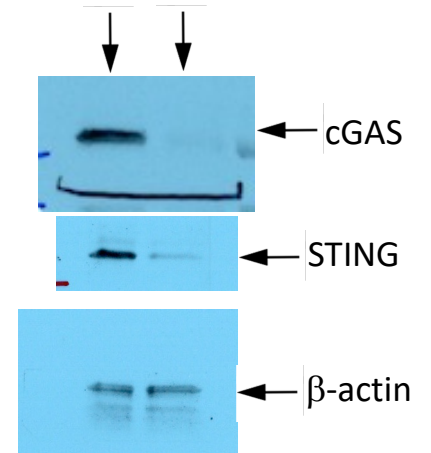

Figure 4B

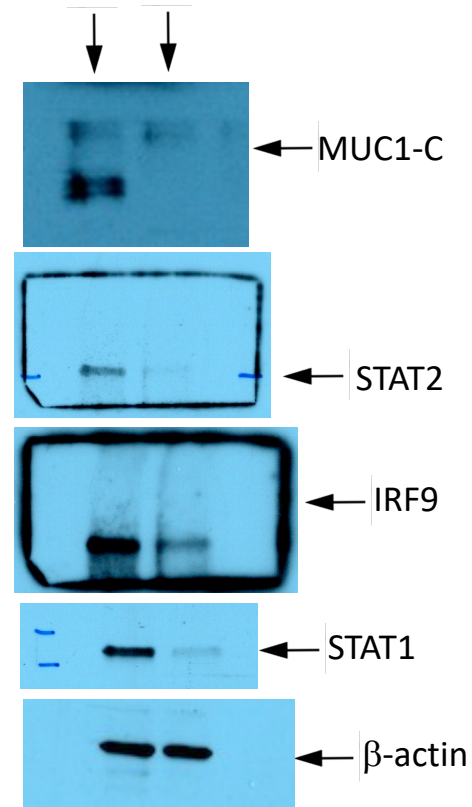

Figure 6A right

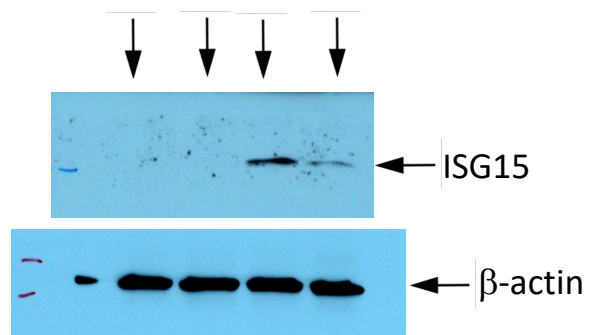

Figure 5A right

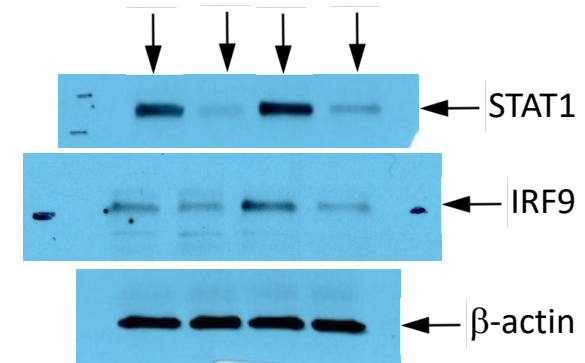

Figure 5B

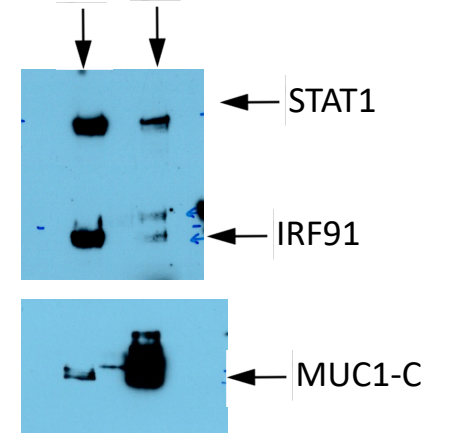

Figure 6D

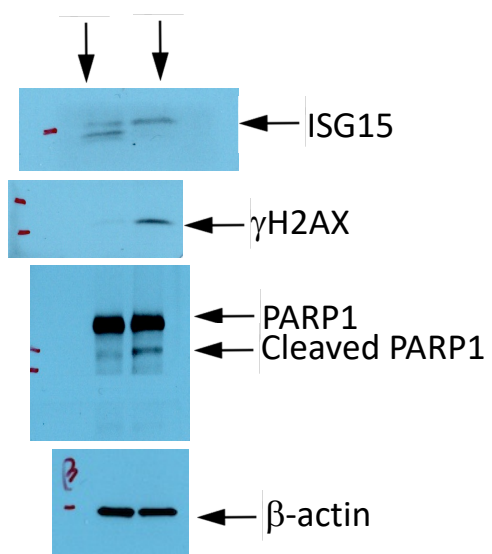

Figure 6E

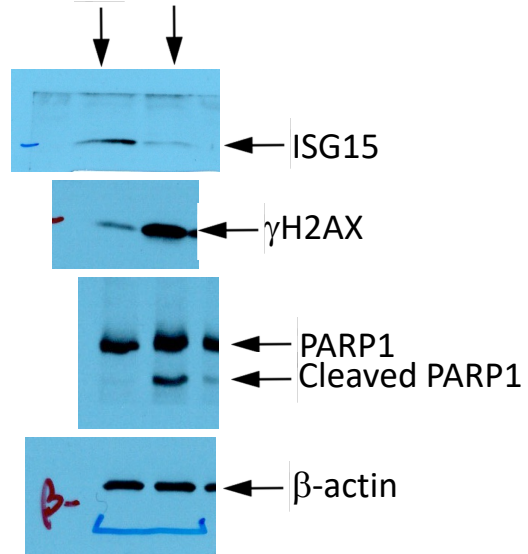

Figure 7A

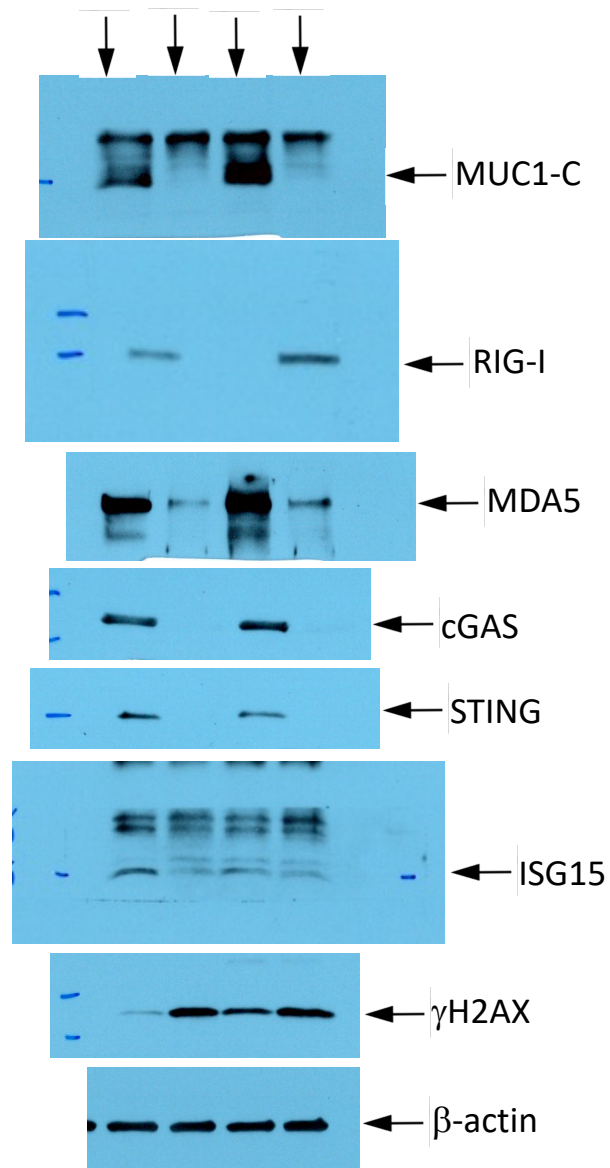

Figure 7B

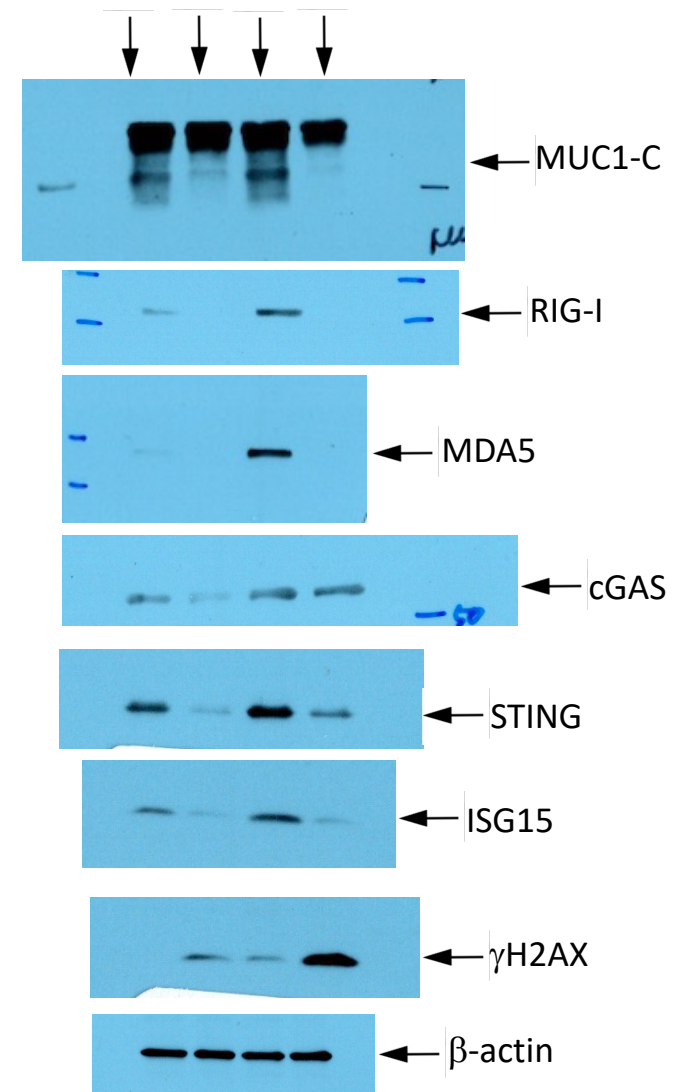

Figure S2A

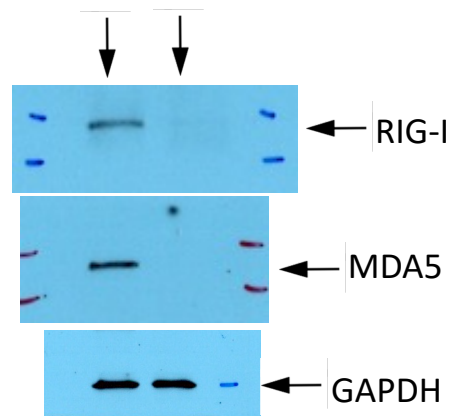

Figure S2B

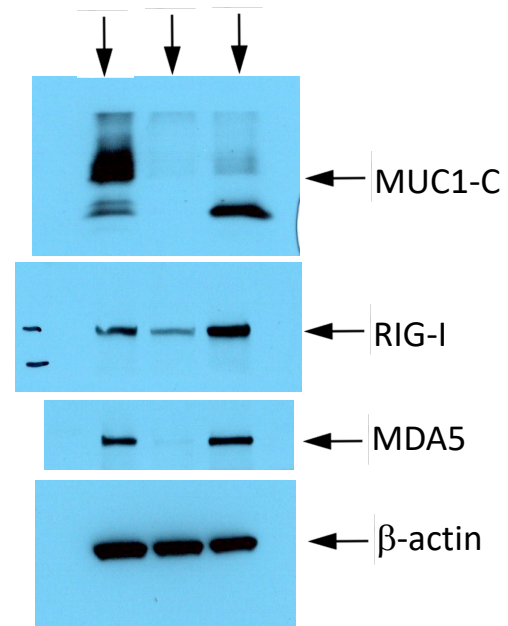

Figure S2D

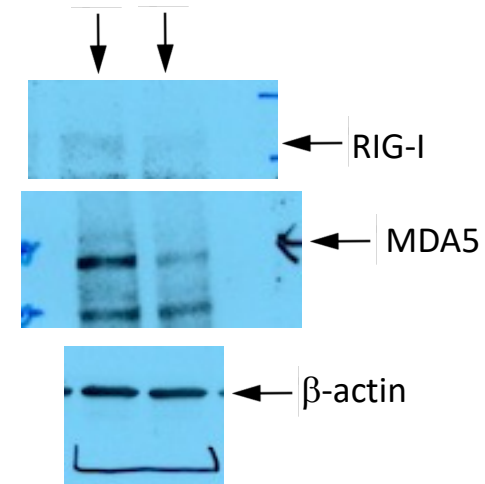

Figure S3C

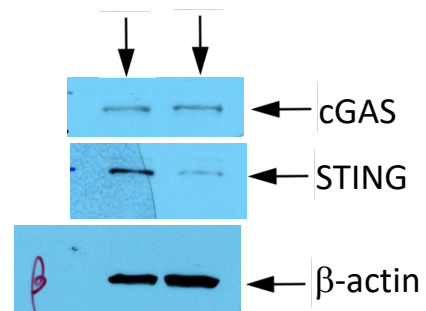

Figure S3D

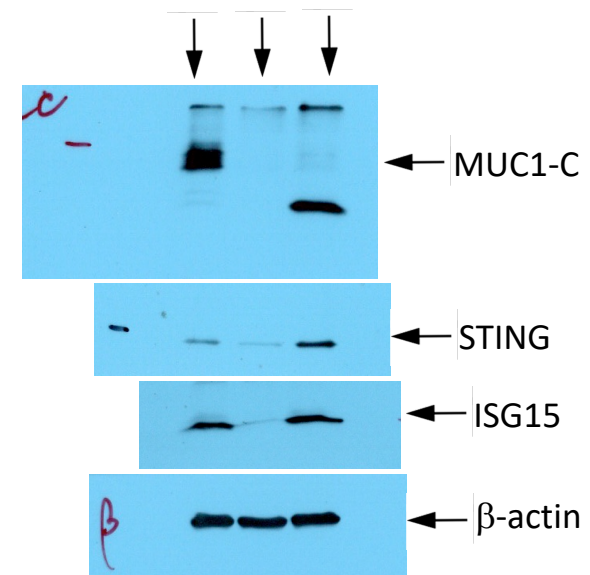

Figure S5A

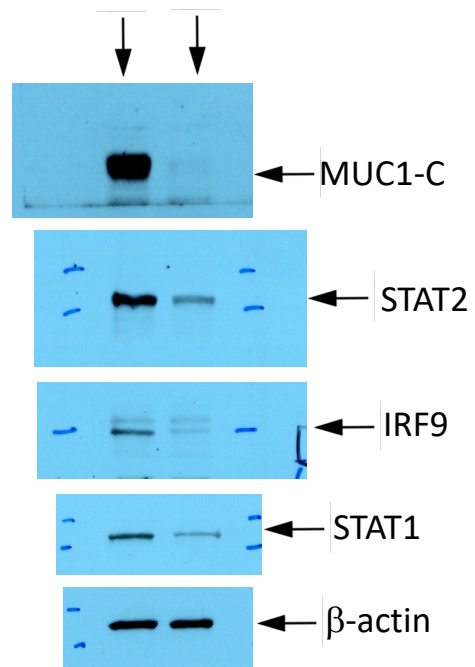

Figure S7A

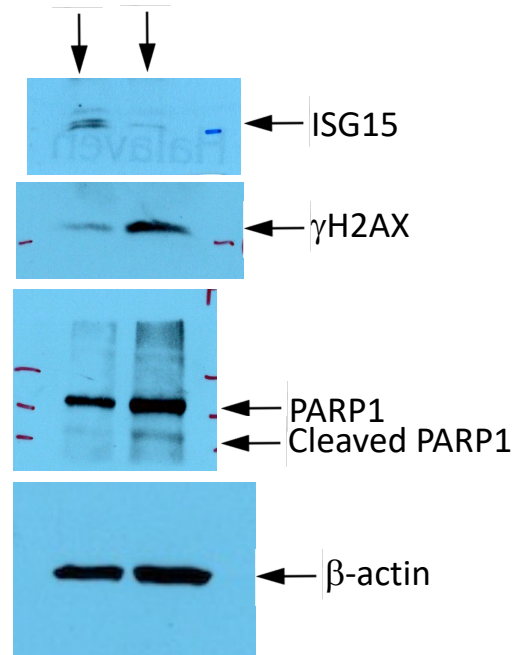

Figure S7B

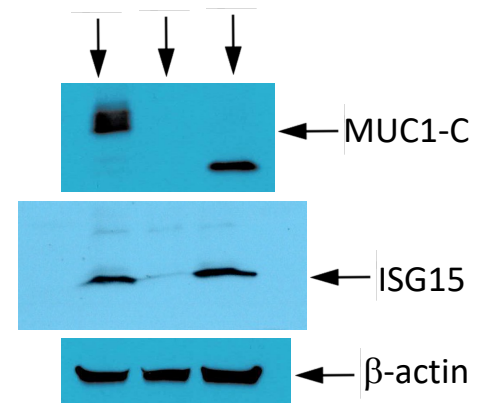

Figure S7C

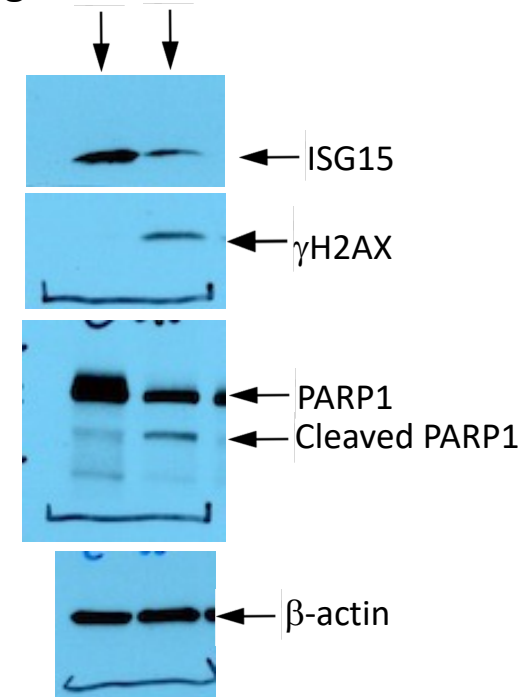

Supplement: s1 [file s1]
