# Supplementary material for: Targeting MUC1-C Suppresses Chronic Activation of Cytosolic Nucleotide Receptors and STING in Triple-Negative Breast Cancer
Source: MDPI journal article supplement (doi:10.3390/cancers14112580), 2022-05-24
Supplement: s1 [file s1]

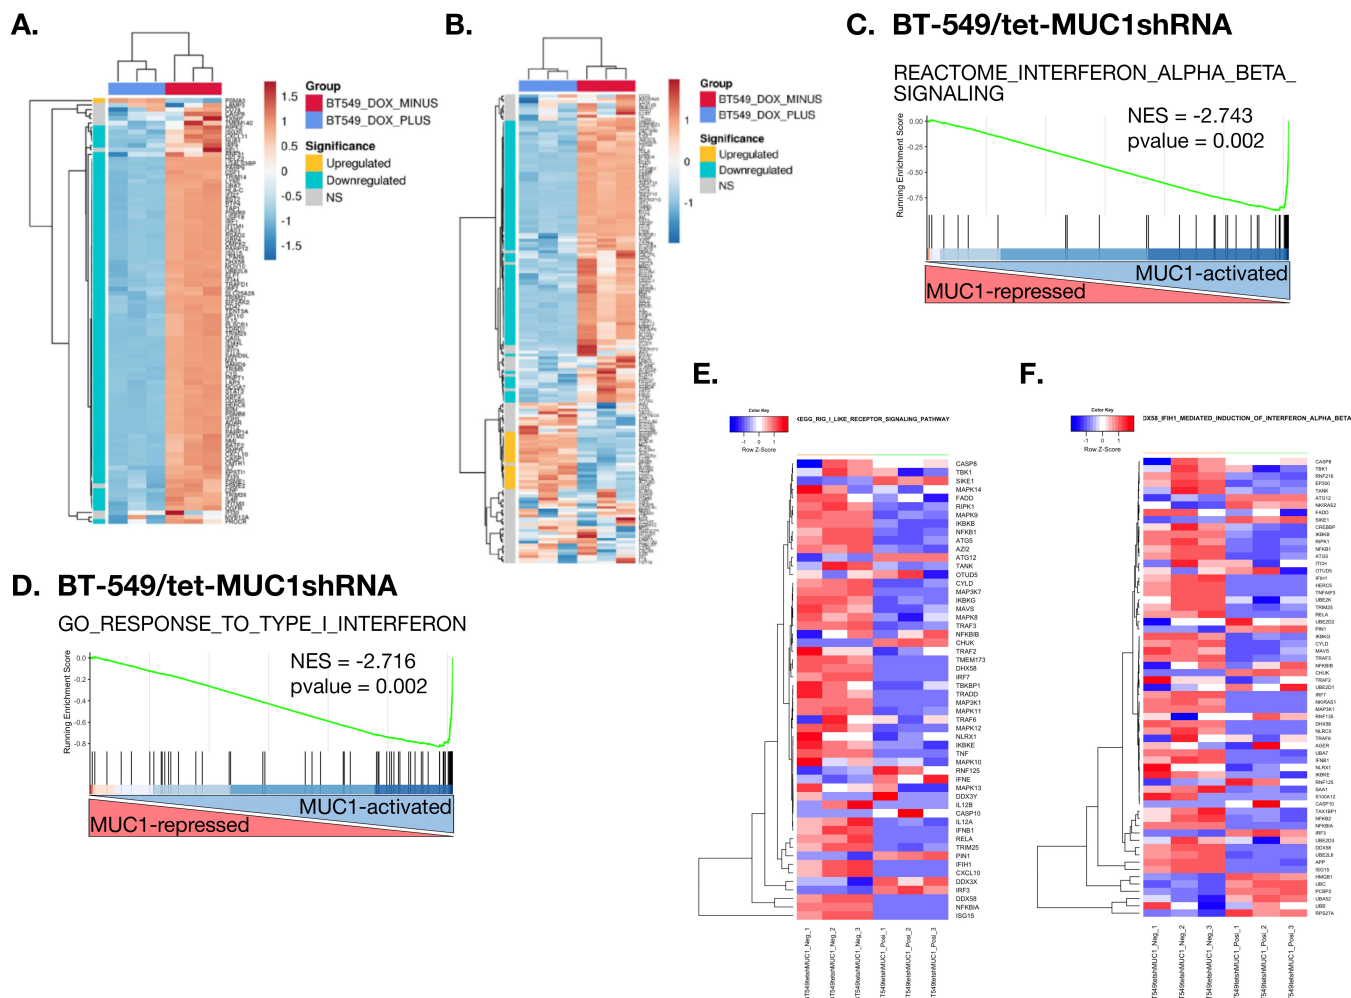

**Supplemental Figure S1. Effects of silencing MUC1-C on expression type I IFN pathway genes.** RNA-seq was performed in triplicate on BT-549/tet-MUC1shRNA cells treated with vehicle of DOX for 7 days. **A and B.** Heatmaps comparing the effects of MUC1 silencing on genes from the HALLMARK INTERFERON ALPHA RESPONSE (A) and HALLMARK INFLAMMATORY RESPONSE (B) pathways. **C and D.** Candidate pathway enrichment plots for the REACTOME INTERFERON ALPHA BETA SIGNALING (C) and GO RESPONSE TO TYPE I INTERFERON (D) pathways. **E and F.** Heatmaps comparing the effects of MUC1 silencing on genes from the KEGG RIG-I LIKE RECEPTOR SIGNALING REACTOME (E) and DDX58 IFIH1 MEDIATED INDUCION OF INTERFERON ALPHA BETA (F) pathways.

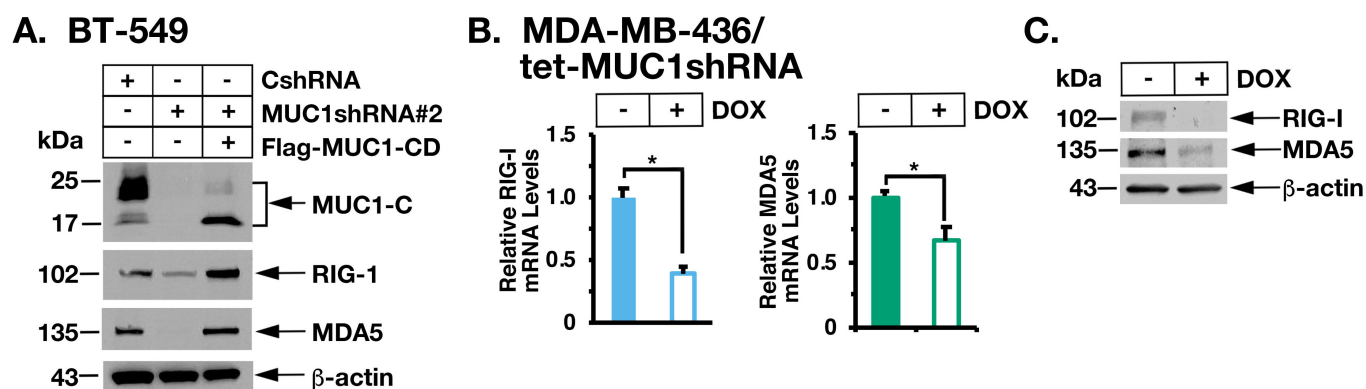

**Supplemental Figure. S2. Silencing MUC1-C in TNBC cells suppresses RIG-I and MDA5 expression. A.** Lysates from BT-549 cells expressing CshRNA, MUC1shRNA#2 and Flag-MUC1-CD were immunoblotted with antibodies against the indicated proteins. **B and C.** MDA-MB-436/tet-MUC1shRNA were treated with vehicle or DOX for 7 days. RIG-I and MDA5 mRNA levels were analyzed by qRT-PCR (**B**). The results (mean  $\pm$  SD of 4 determinations) are expressed as relative mRNA levels compared to that obtained for vehicle-treated cells (assigned a value of 1). Lysates were immunoblotted with antibodies against the indicated proteins (**C**).



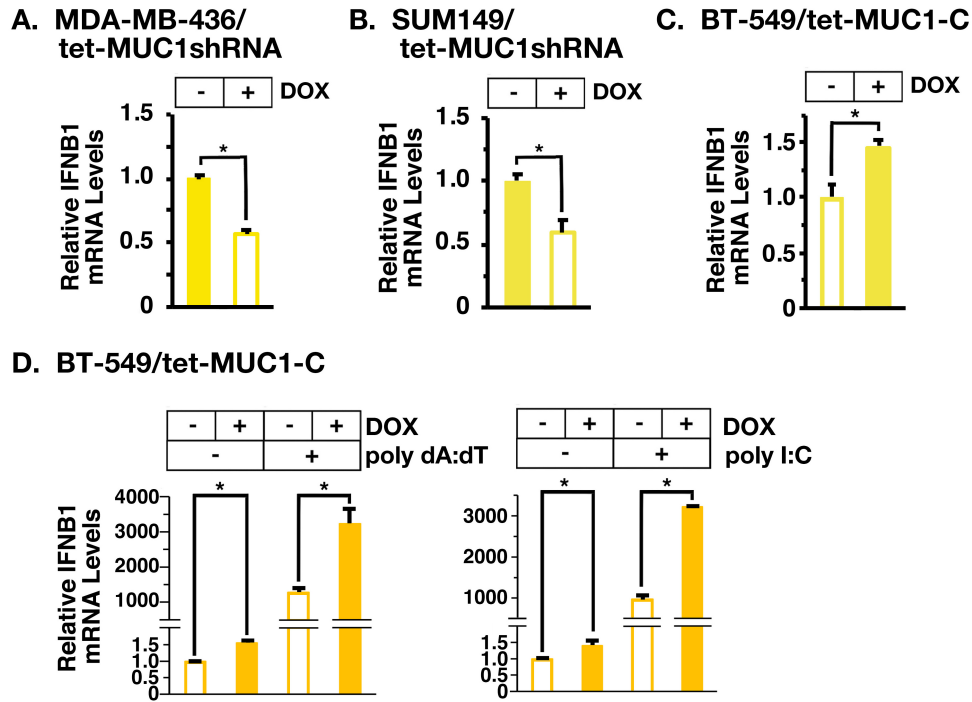

**Supplemental Figure S4. MUC1-C drives IFNβ1 expression in TNBC cells.** **A and B.** MDA-MB-436/tet-MUC1shRNA (**A**) and SUM149/tet-MUC1shRNA (**B**) cells treated with vehicle or DOX for 7 days were analyzed for IFNβ1 mRNA levels by qRT-PCR. **C.** BT-549 cells expressing a tet-inducible MUC1-C vector treated with vehicle or DOX for 7 days were analyzed for IFNβ1 mRNA levels by qRT-PCR. **D.** BT-549 cells expressing a tet-inducible MUC1-C vector treated with vehicle or DOX for 7 days were transfected with poly I:C (left) or poly dA:dT (right) for 4 hours and analyzed for IFNβ1 mRNA levels by qRT-PCR. The results (mean±SD of 4 determinations) are expressed as relative mRNA levels compared to that obtained for vehicle-treated cells (assigned a value of 1).



### A. MDA-MB-436/tet-MUC1shRNA

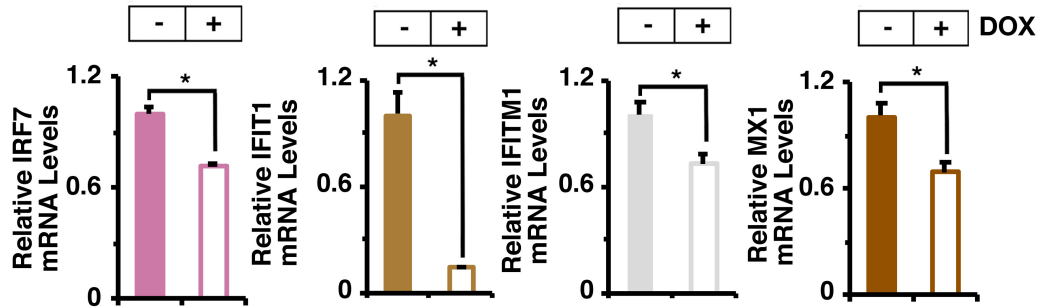

### B. SUM149/tet-MUC1shRNA

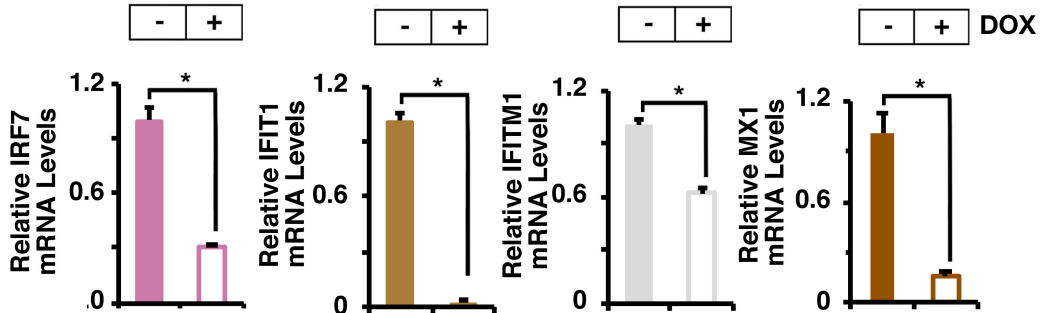

**Supplemental Figure S5. Effects of silencing MUC1-C on gene expression.** A and B. MDA-MB-436/tet-MUC1shRNA (A) and SUM149/tet-MUC1shRNA (B) cells treated with vehicle of DOX for 7 days were analyzed for the indicated mRNA levels by qRT-PCR. The results (mean $\pm$ SD of 4 determinations) are expressed as relative mRNA levels compared to that obtained for vehicle-treated cells (assigned a value of 1).

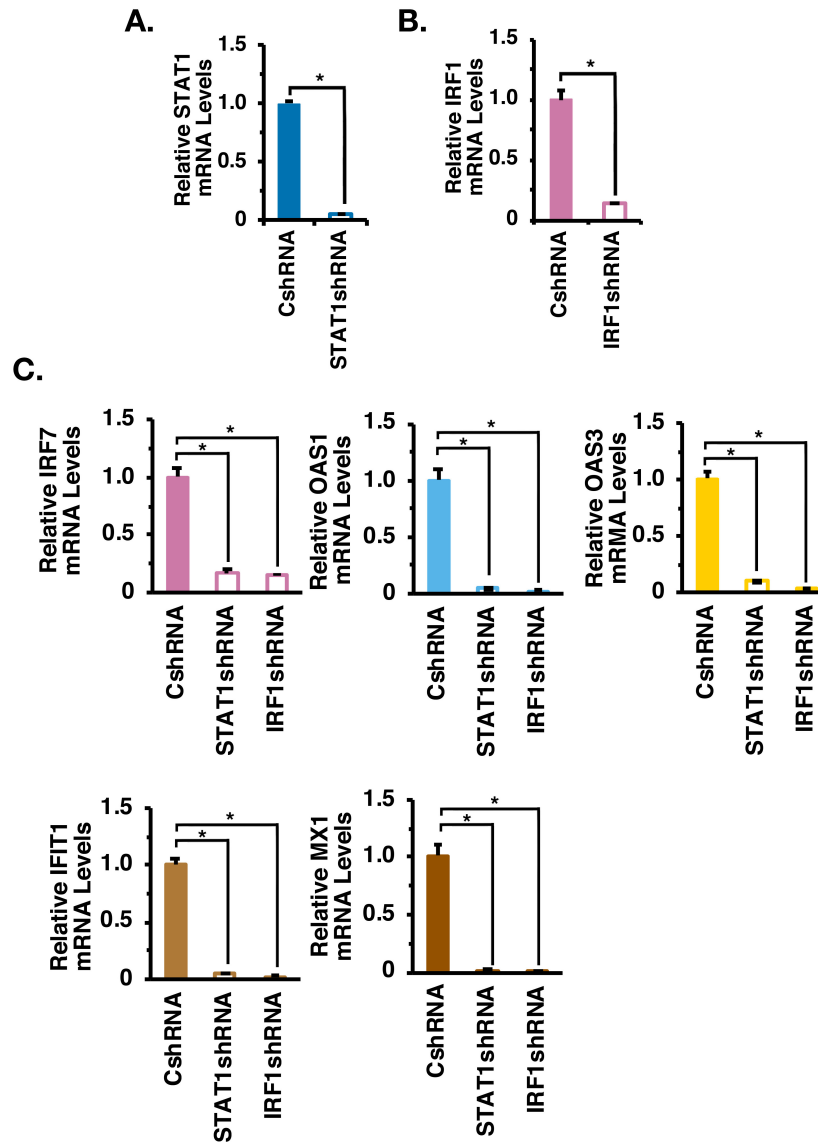

**Supplemental Figure S6. Effects of silencing STAT1 and IRF1 on IRDS gene expression.** A and B. BT-549 cells expressing a control CshRNA, STAT1shRNA (A) or IRF1shRNA (B) were analyzed for the indicated mRNA levels by qRT-PCR. C. BT-549 cells expressing a CshRNA, STAT1shRNA or IRF1shRNA were analyzed for the indicated mRNA levels by qRT-PCR. The results (mean $\pm$ SD of 4 determinations) are expressed as relative mRNA levels compared to that obtained for vehicle-treated cells (assigned a value of 1).

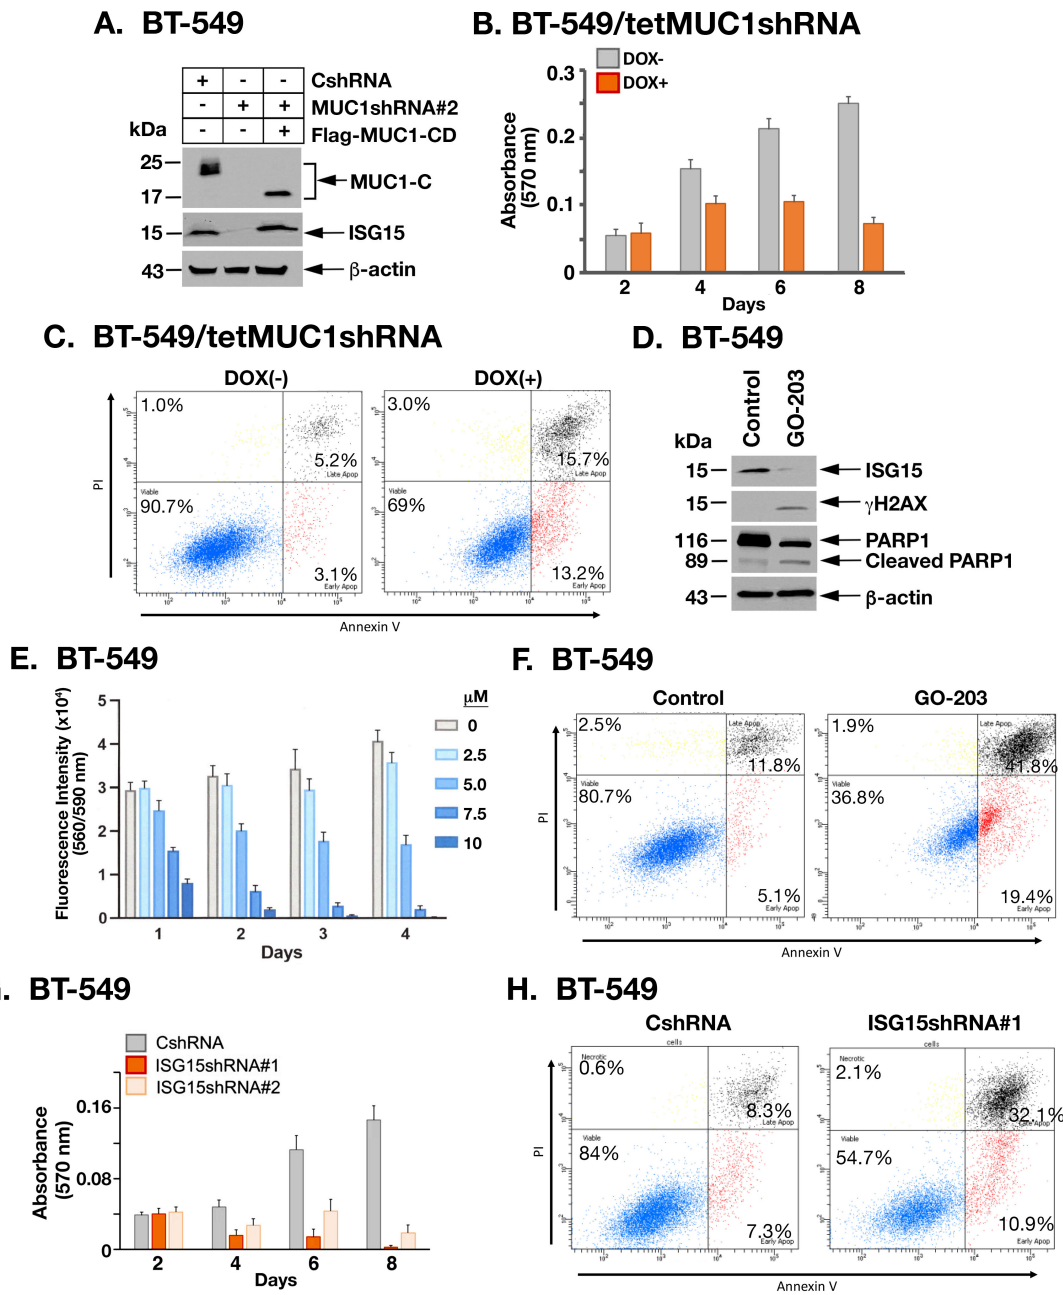

**Supplemental Figure S7. Effects of silencing MUC1-C and ISG15 on induction of DNA damage and apoptosis.** **A.** Lysates from BT-549 cells expressing CshRNA, MUC1shRNA#2 and Flag-MUC1-CD were immunoblotted with antibodies against the indicated proteins. **B and C.** BT-549/tet-MUC1shRNA cells treated with vehicle or DOX were monitored at the indicated times after seeding for cell proliferation as determined by the AlamarBlue assay (**B**). Cells were analyzed by flow cytometry for Annexin V and propidium iodide staining at 5 days (**C**). The results are representative of 3 determinations. **D.** Lysates from BT-549 cells left untreated or treated with 10  $\mu$ M GO-203 for 24 hours were immunoblotted with antibodies against the indicated proteins. **E and F.** BT-549 cells left untreated or treated with the indicated concentrations of GO-203 were monitored at the indicated times for cell proliferation as determined by the AlamarBlue assay (**E**). Cells were analyzed by flow cytometry for Annexin V and propidium iodide staining at 2 days (**F**). The results are representative of 3 determinations. **G and H.** BT-549 cells expressing a CshRNA, ISG15shRNA#1 or ISG15shRNA#2 were monitored at the indicated times after seeding for cell proliferation as determined by the AlamarBlue assay (**G**). Cells were analyzed by flow - cytometry for Annexin V and propidium iodide staining at 3.5 days (**H**). The results are representative of 3 determinations.

**Table S1. Primers used for qRT-PCR.**

| <b>Primer</b>                   | <b>FWD</b>              | <b>REV</b>              |
|---------------------------------|-------------------------|-------------------------|
| <b>MUC1-C</b>                   | AGACGTCAGCGTGAGTGATG    | GCCAAGGCAATGAGATAGAC    |
| <b>STAT1</b>                    | GGAACCTTGATGGCCCTAAAGGA | ACAGAGCCCACTATCCGAGACA  |
| <b>STAT2</b>                    | GCAGCACAATTTGCGGAA      | ACAGGTGTTTCGAGAACTGGC   |
| <b>IRF1</b>                     | CATGGCTGGGACATCAACAA    | TTGTATCGGCCTGTGTGAATG   |
| <b>IRF7</b>                     | GCAGCGTGAGGGTGTGTCTT    | GCTCCATAAGGAAGCACTCGAT  |
| <b>IRF9</b>                     | CCCGACCTCACCGATGAC      | TCTCGCGAAGCTGGATGTC     |
| <b>RIG-I</b>                    | CTGGACCCTACCTACATCCTG   | GGCATCCAAAAAGCCACGG     |
| <b>MDA5</b>                     | CCATGGAGAAGGCTGGGG      | CAAAGTTGTCATGGATGACC    |
| <b>CGAS</b>                     | TAACCCTGGCTTTGGAATCAAAA | TGGGTACAAGGTAAAATGGCTTT |
| <b>STING</b>                    | AGCATTACAACAACCTGCTACG  | GTTGGGGTCAGCCATACTCAG   |
| <b>IFNB1</b>                    | ATGACCAACAAGTGTCTCCTCC  | GGAATCCAAGCAAGTTGTAGCTC |
| <b>OAS1</b>                     | TGAGGTCCAGGCTCCACGCT    | GCAGGTCGGTGCCTCCTCG     |
| <b>OAS3</b>                     | CCGAAGTGTCTGGGCCTGATCC  | CCCATTCCCCAGGTCCCATGTGG |
| <b>IFIT1</b>                    | TTGCAGGAAACACCCACTTCT   | GCAAAGCCCTATCTGGTGATG   |
| <b>MX1</b>                      | CTTTCCAGTCCAGCTCGGCA    | AGCTGCTGGCCGTACGTCTG    |
| <b>IFITM1</b>                   | GGATTTTCGGCTTGTCCCGAG   | CCATGTGGAAGGGAGGGCTC    |
| <b>ISG15</b>                    | CGCAGATCACCCAGAAGATCG   | TTCGTCCGATTTGTCCACCA    |
| <b><math>\beta</math>-actin</b> | GATGAGATTGGCATGGCTTT    | CACCTTCACCGTTCCAGTTT    |
| <b>GAPDH</b>                    | CCATGGAGAAGGCTGGGG      | CAAAGTTGTCATGGATGACC    |

**Table S2. Primers used for ChIP-qPCR.**

| <b>Primer</b> | <b>FWD</b>              | <b>REV</b>            |
|---------------|-------------------------|-----------------------|
| <b>pRIG1</b>  | GGAGGGAAACGAAACTAGCC    | TTAAAGCCGGGTAGGAGGAG  |
| <b>pMDA5</b>  | CTTTGTAAACGTAATCTGCCTGG | GCTTTCCTTTTCTGTTCCCG  |
| <b>pSTING</b> | GTGCAGCCTGAAAATGAGATG   | TTCCTACCTCCCTTCCTGAG  |
| <b>pISG15</b> | CGGTTTTGTTTCTCCGCTCA    | AGCACCGGCCCTATTATAAGC |
